# Supplementary material
Source: publisher figshare collection journal article supplement (https://sage.figshare.com/ndownloader/files/23391833)
Supplement: Supplementary file 1 [file 23391833]

WHO Collaborating Centre for eHealth,  
School of Public Health & Community Medicine,  
University of New South Wales, Sydney

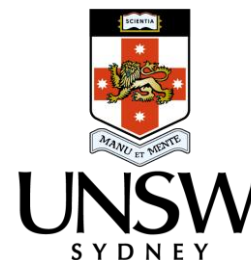

[INSERT date]  
[INSERT Name]  
[INSERT Address 1]  
[INSERT Address 2]

Dear [Mr/Ms/Mrs/Dr Surname],

**Research Study Title:** *Developing and testing a conceptual framework for the utilization of Digital Health, Social Enterprise and Citizen Engagement in the co-creation of Integrated People-Centred Health Services.*

I am writing to invite you to participate in an interview for the abovenamed study. The research is being conducted by the School of Public Health & Community Medicine at the University of New South Wales (UNSW Sydney). Your contact information was obtained from public records.

This research is being done to learn more about how digital technology, social enterprise and citizen engagement are used together in the creation of integrated health and care services. The reason we want to know more about this, is so that we can develop a framework that can be used to create and enable sustainable social enterprises that utilise digital health and citizen engagement to deliver integrated, people-centred health services, to ultimately

- improve the health and well-being of citizens;
- strengthen democratic participation and institutional responsiveness;
- strengthen digital literacy for service procurement and social engagement;
- create sustainable employment opportunities and economic growth.

Taking part in this research study is optional. We are looking for people who want to take part in this research and who are:

- Involved in the management and/or operation of Community Health Alliances;
- Involved in organisational partners of Community Health Alliances;
- Service providers or representatives of community organisations that work in partnership with Community Health Alliances;
- Civil servants or elected representatives who work in partnership with Community Health Alliances

If you decide to take part in the research we would:

- Conduct an audio-recorded interview with you; store, transcribe and analyse this data; verify our findings with you; and keep you appraised on the progress and outcomes of our research project.

If you would like more information or are interested in being part of the research study please contact:

|                 |                                                                                                                                             |
|-----------------|---------------------------------------------------------------------------------------------------------------------------------------------|
| <b>Name:</b>    | <b>Dr. Myron A. Godinho</b>                                                                                                                 |
| <b>Email:</b>   | <a href="mailto:m.godinho@unsw.edu.au">m.godinho@unsw.edu.au</a>                                                                            |
| <b>Phone:</b>   | +61450693161                                                                                                                                |
| <b>Website:</b> | <a href="https://sphcm.med.unsw.edu.au/student-profile/dr-myron-godinho">https://sphcm.med.unsw.edu.au/student-profile/dr-myron-godinho</a> |

Taking part in this research study is voluntary. You may choose not to take part. If you decide not to take part in this research, your decision will not affect your relationship with The University of New South Wales or any other organisations or individuals involved (e.g. Community Health Alliances and their partner organisations).

This research has been reviewed and approved by The University of New South Wales Human Research Ethics Committee. If you have any complaints or concerns about the research study please email [humanethics@unsw.edu.au](mailto:humanethics@unsw.edu.au) or phone +61 2 9385 6222 quoting the following number HC[INSERT HC Number].

Yours sincerely,

**Dr. Siaw-Teng Liaw**

Professor of General Practice & Director of the WHO Collaborating Centre for eHealth,  
School of Public Health & Community Medicine,  
UNSW Sydney
